# **$\alpha$ -Synuclein plasma membrane localization correlates with cellular phosphatidylinositol polyphosphate levels.**

Cédric Eichmann\*<sup>1</sup>, Reeba Susan Jacob\*, Alessandro Dema<sup>2</sup>, Davide Mercadante<sup>3</sup> and Philipp Selenko

Department of Biological Regulation, Weizmann Institute of Science,  
234 Herzl Street, 76001 Rehovot, Israel

<sup>1</sup> present address: ETH Zurich, Department of Chemistry and Applied Biosciences, Laboratory of Physical Chemistry, Vladimir-Prelog-Weg 1-5/10, 8093 Zurich, Switzerland

<sup>2</sup> present address: UCSF, School of Dentistry, Department of Cell and Tissue Biology, 513 Parnassus Ave, San Francisco, CA 94143, USA

<sup>3</sup> present address: School of Chemical Sciences, University of Auckland, 23 Symonds Street, Auckland, New Zealand

\* these authors contributed equally

To whom the correspondence should be addressed: [philipp.selenko@weizmann.ac.il](mailto:philipp.selenko@weizmann.ac.il)

## Abstract

The Parkinson's disease protein  $\alpha$ -synuclein ( $\alpha$ Syn) promotes membrane fusion and fission by interacting with various negatively charged phospholipids. Despite postulated roles in endocytosis and exocytosis, plasma membrane (PM) interactions of  $\alpha$ Syn are poorly understood. Here, we show that phosphatidylinositol 4,5-bisphosphate (PIP<sub>2</sub>) and phosphatidylinositol 3,4,5-trisphosphate (PIP<sub>3</sub>), two highly acidic components of inner PM leaflets, mediate plasma membrane localization of endogenous pools of  $\alpha$ Syn in A2780, HeLa, SH-SY5Y and SK-MEL-2 cells. We demonstrate that  $\alpha$ Syn binds reconstituted PIP<sub>2</sub>-membranes in a helical conformation *in vitro* and that PIP<sub>2</sub> kinases and phosphatases reversibly redistribute  $\alpha$ Syn in cells. We further delineate that  $\alpha$ Syn-PM targeting follows phosphoinositide-3 kinase (PI3K)-dependent changes of cellular PIP<sub>2</sub> and PIP<sub>3</sub> levels, which collectively suggests that phosphatidylinositol polyphosphates contribute to  $\alpha$ Syn's cellular function(s) at the plasma membrane. (125 words)

**Keywords:** Confocal immunofluorescence microscopy, total internal reflection microscopy, nuclear magnetic resonance spectroscopy, circular dichroism, dynamic light scattering, negative-stain transmission electron microscopy.

## Introduction

Aggregates of human  $\alpha$ -synuclein ( $\alpha$ Syn) constitute the main components of Lewy body inclusions in Parkinson's disease (PD) and other synucleinopathies<sup>1</sup>.  $\alpha$ Syn is expressed throughout the brain and abundantly found in presynaptic terminals of dopaminergic neurons, where it is involved in synaptic vesicle clustering and trafficking<sup>2</sup>. Whereas isolated  $\alpha$ Syn is disordered in solution, residues 1-100 adopt extended or kinked helical conformations upon binding to membranes containing negatively charged phospholipids<sup>3</sup>. Complementary electrostatic interactions between lysine residues within  $\alpha$ Syn's N-terminal KTKEGV-repeats and acidic phospholipid headgroups align these  $\alpha$ -helices on respective membrane surfaces<sup>4</sup>. Membrane curvature<sup>5</sup>, lipid packing defects<sup>6, 7</sup> and fatty acid compositions<sup>8, 9</sup> act as additional determinants for membrane binding.  $\alpha$ Syn actively remodels target membranes<sup>10, 11</sup>, which may relate to its biological function(s) in vesicle docking, fusion and fission<sup>2</sup>. Furthermore,  $\alpha$ Syn multimerization and aggregation may initiate at membrane surfaces, which holds important ramifications for possible cellular scenarios in PD<sup>9</sup>. Early  $\alpha$ Syn oligomers bind to and disrupt cellular and reconstituted membranes<sup>12, 13</sup>, whereas mature aggregates are found closely associated with membranous cell structures and intact organelles in cellular models of Lewy body inclusions<sup>14</sup> and in post-mortem brain sections of PD patients<sup>15</sup>.

Phosphatidylinositol phosphates (PIPs) are integral components of cell membranes and a universal class of acidic phospholipids with key functions in biology<sup>16</sup>. Reversible phosphorylation of their inositol headgroups at positions 3, 4 and 5 generates seven types of PIPs, which act as selective binding sites for folded and disordered PIP-interaction domains<sup>17</sup>. In eukaryotic cells, PIPs make up less than 2% of total phospholipids with phosphatidylinositol 4,5-bisphosphate, PI(4,5)P<sub>2</sub>, or PIP<sub>2</sub> hereafter, as the most common species (10% of total PIPs)<sup>18</sup>. PIPs function as core determinants of organelle identity<sup>19</sup>. PIP<sub>2</sub> is exclusively found at the inner leaflet of the plasma membrane (PM), where it acts as a signaling scaffold and protein-

recruitment platform<sup>20</sup>. Carrying a negative net charge of -4 at pH 7 renders it more acidic than other cellular phospholipids such as phosphatidylserine (net charge -1) or phosphatidic acid (net charge -1)<sup>21</sup>. Disordered PIP<sub>2</sub>-binding domains contain stretches of polybasic residues that establish complementary electrostatic contacts with the negatively-charged phosphatidylinositol-phosphate head-groups<sup>18</sup> reminiscent of how  $\alpha$ Syn KTKEGV-lysines interact with acidic phospholipids<sup>22</sup>. Indeed,  $\alpha$ Syn has been shown to bind to reconstituted PIP<sub>2</sub> vesicles *in vitro*<sup>23</sup>. Phosphatidylinositol 3,4,5-trisphosphate, PI(3,4,5)P<sub>3</sub>, or PIP<sub>3</sub> hereafter, harbors an additional phosphate group, which renders it even more acidic (net charge -5 at pH 7)<sup>21</sup>. The steady-state abundance of PIP<sub>3</sub> at the PM is low<sup>16</sup> but local levels increase dynamically in response to cell signaling, especially following phosphatidylinositol-3 kinase (PI3K) activation<sup>24</sup>.

Here, we set out to investigate whether native  $\alpha$ Syn interacted with plasma membrane PIP<sub>2</sub> and PIP<sub>3</sub> in mammalian cells. Using confocal and total internal reflection fluorescence microscopy, we show that endogenous  $\alpha$ Syn forms discrete foci at the PM of human A2780, HeLa, SH-SY5Y and SK-MEL-2 cells and that the abundance and localization of these foci correlate with pools of PM PIP<sub>2</sub> and PIP<sub>3</sub>. We further delineate high-resolution insights into  $\alpha$ Syn interactions with reconstituted PIP<sub>2</sub> vesicles by nuclear magnetic resonance (NMR) spectroscopy and establish that  $\alpha$ Syn binds PIP<sub>2</sub> membranes in its characteristic helical conformation.

## Results

### PM localization of endogenous $\alpha$ Syn

To determine the intracellular localization of  $\alpha$ Syn, we selected a panel of human cell lines (A2780, HeLa, SH-SY5Y and SK-MEL-2) that expressed low but detectable amounts of the endogenous protein. Confocal immunofluorescence localization in A2780 cells with an antibody that specifically recognizes  $\alpha$ Syn without cross-reacting with its  $\beta$ - and  $\gamma$ -isoforms (**Figure 1 – figure supplement 1A**), revealed a speckled intracellular distribution with distinct  $\alpha$ Syn foci at apical and basal PM regions (**Figure 1A**). We verified overall antibody specificity by downregulating  $\alpha$ Syn expression via siRNA-mediated gene silencing, which established that  $\alpha$ Syn foci corresponded to endogenous protein pools (**Figure 1B** and **Figure 1 – figure supplement 1B**). To investigate colocalization of  $\alpha$ Syn with PM PIP<sub>2</sub>, we co-stained A2780 cells with antibodies against  $\alpha$ Syn and PIP<sub>2</sub> (**Figure 1C**). In 10-20% of cases, we detected clear superpositions of  $\alpha$ Syn and PIP<sub>2</sub> signals, which we confirmed by measuring fluorescence intensity profiles over individual cell cross-sections (**Figure 1D**). To test whether changes in cellular PIP<sub>2</sub> levels affected  $\alpha$ Syn abundance at the PM, we transiently over-expressed green fluorescent protein (GFP)-tagged phosphatidylinositol-4-phosphate 5-kinase PIPKI $\gamma$ <sup>25</sup>. PIPKI $\gamma$  localizes to the PM via a unique di-lysine motif in its activation-loop<sup>26</sup>. Upon kinase expression, confirmed by GFP fluorescence, we detected increased amounts of  $\alpha$ Syn at the PM of transfected cells (**Figure 1E**). By contrast, expression of GFP alone did not alter  $\alpha$ Syn levels. We obtained similar results in HeLa and SH-SY5Y transfected cells (**Figure 1E** and **Figure 1 – figure supplement 1C**). These findings suggested that PM localization of endogenous  $\alpha$ Syn correlated with cellular PIP<sub>2</sub> levels. To better resolve the presence of  $\alpha$ Syn at the PM, we resorted to total internal reflection fluorescence (TIRF) microscopy. Employing a narrow evanescent field depth of ~50 nm, we detected endogenous  $\alpha$ Syn at PM foci in A2780, HeLa,

SH-SY5Y and SK-MEL-2 cells, which correlated with the abundance of total  $\alpha$ Syn determined by semi-quantitative Western blotting (**Figure 1 – figure supplement 1D**).

### **$\alpha$ Syn binds reconstituted PIP<sub>2</sub> vesicles**

To test whether  $\alpha$ Syn directly bound PIP<sub>2</sub> membranes under physiological salt and pH conditions (150 mM, pH 7.0), we added N-terminally acetylated, <sup>15</sup>N isotope-labeled  $\alpha$ Syn to reconstituted PIP<sub>2</sub> vesicles. Circular dichroism (CD) spectroscopy revealed characteristic helical signatures<sup>27, 28</sup> (**Figure 2A**), whereas NMR experiments confirmed site-selective line-broadening of N-terminal residues 1-100, confirming membrane binding<sup>29, 30</sup> (**Figure 2B** and **Figure 2 – figure supplement 1**). In line with these observations, we detected remodeled PIP<sub>2</sub> vesicles by negative-stain transmission electron microscopy (EM), manifested by tubular extrusions emanating from reconstituted specimens and agreeing with published findings on other membrane systems<sup>10, 11</sup> (**Figure 2A**). Together, these results established that residues 1-100 of  $\alpha$ Syn interacted with PIP<sub>2</sub> vesicles in helical conformations that imposed membrane remodeling. To gain further insights into  $\alpha$ Syn-PIP<sub>2</sub> interactions, we reconstituted phosphatidylcholine (PC):PIP<sub>2</sub> vesicles (~100 nm diameter) at fixed molar ratios of 9:1 (**Figure 2C**). We added increasing amounts of these PC-PIP<sub>2</sub> vesicles to  $\alpha$ Syn and measured CD and dynamic light scattering (DLS) spectra of the resulting mixtures. Up to a 50-fold molar excess of lipid to protein,  $\alpha$ Syn interacted with PC-PIP<sub>2</sub> vesicles in a helical conformation without disrupting the monodisperse nature of the specimens, i.e. without membrane remodeling (**Figure 2C** and **Figure 2 – figure supplement 2A**). In parallel, we performed NMR experiments on these samples and measured intensity changes of  $\alpha$ Syn resonances in a residue-resolved manner (**Figure 2D** and **Figure 2 – figure supplement 2B**). Analyzing signal ratios ( $I/I_0$ ) of unbound and PC-PIP<sub>2</sub>-bound  $\alpha$ Syn, we found that residues 1-10 constituted the primary interaction sites, whereas residues 10-100 displayed progressively weaker membrane contacts.

In agreement with our experiments on PIP<sub>2</sub>-only vesicles, we detected no contributions by C-terminal  $\alpha$ Syn residues. These findings confirmed the tri-segmental nature of  $\alpha$ Syn-PIP<sub>2</sub> interactions and the importance of anchoring contacts by N-terminal  $\alpha$ Syn residues, similar to other membrane systems<sup>29, 31, 32</sup>. To further validate our conclusions, we performed NMR experiments with mutant forms of  $\alpha$ Syn in which we deleted residues 1-4 ( $\Delta$ N)<sup>33</sup>, substituted Phe4 and Tyr39 with alanine (F4A-Y39A)<sup>34</sup>, or oxidized  $\alpha$ Syn Met1, Met5, Met116 and Met123 to methionine-sulfoxides (MetOx)<sup>35</sup> (**Figure 2 – figure supplement 3A**). In line with earlier reports, we did not observe binding to PC-PIP<sub>2</sub> vesicles for any of these variants. Our results corroborated that PC-PIP<sub>2</sub> interactions strongly depended on intact N-terminal  $\alpha$ Syn residues, with critical contributions by Phe4 and Tyr39, and requiring Met1 and Met5 in their reduced states.

In contrast to other lipids, phosphatidylinositol phosphates offer attractive means to regulate the reversibility of  $\alpha$ Syn-membrane interactions. Different charge states of PIPs can be generated from phosphatidylinositol (PI) precursors by action of PIP kinases and phosphatases<sup>36</sup> or via PIP conversion by lipases such as phospholipase C (PLC) to produce soluble inositol 1,4,5-trisphosphate (IP<sub>3</sub>) and diacylglycerol (DAG)<sup>37</sup> (**Figure 2 – figure supplement 3B**). To investigate the reversibility of  $\alpha$ Syn-PIP<sub>2</sub> interactions, we prepared PC-PIP<sub>2</sub> vesicles bound to <sup>15</sup>N isotope-labeled  $\alpha$ Syn to which we added catalytic amounts of unlabeled PLC. We reasoned that PLC will progressively hydrolyze PIP<sub>2</sub> binding sites and, concomitantly, release  $\alpha$ Syn. In turn, we expected to observe an increase of  $\alpha$ Syn NMR signals corresponding to the fraction of accumulating, unbound protein molecules. Indeed, we detected the progressive recovery of  $\alpha$ Syn NMR signals upon PLC addition (**Figure 2E and Figure 2 – figure supplement 3C**). Next, we asked whether  $\alpha$ Syn binding to PC-PIP<sub>2</sub> vesicles was sensitive to calcium, a competitive inhibitor of many protein-PIP<sub>2</sub> interactions<sup>38</sup>. We found that tethering of N-terminal  $\alpha$ Syn residues to PC-PIP<sub>2</sub> vesicles remained intact at high calcium

concentrations (2.5 mM), whereas we determined gradually weakened interactions towards the C-terminus of the protein (**Figure 2E** and **Figure 2 – figure supplement 4A**). These findings confirmed earlier results on the stability of  $\alpha$ Syn PC-PIP<sub>2</sub> vesicle interactions in the presence of calcium<sup>23</sup>. Notably, DLS measurements showed that hydrodynamic diameters of PC-PIP<sub>2</sub> vesicles expanded upon PLC treatment and in the presence of calcium, irrespective of whether  $\alpha$ Syn was bound (**Figure 2F** and **Figure 2 – figure supplement 4B**). This further suggested that vesicle remodeling and concomitant curvature reductions did not abolish  $\alpha$ Syn interactions. Finally, we sought to determine to what extent the number and positions of inositol phosphates and their corresponding negative charge states contributed to  $\alpha$ Syn binding. In a first step, we titrated free inositol polyphosphate (IP<sub>6</sub>) to <sup>15</sup>N isotope-labeled  $\alpha$ Syn. Surprisingly, we did not detect binding of  $\alpha$ Syn to this highly negatively-charged entity (**Figure 2 – figure supplement 4C**). Aiming to establish whether  $\alpha$ Syn interacted with mono-, di- or tri-phosphorylated inositol in a position-dependent manner, we probed a commercial dot-blot of immobilized PIPs with recombinant  $\alpha$ Syn. Similar to IP<sub>6</sub> results, we did not observe binding to any of the spotted lipids (data not shown). From these experiments we concluded that  $\alpha$ Syn did not interact with PIPs in non-membranous environments and that electrostatic headgroup-interactions alone did not suffice for binding.

### **$\alpha$ Syn-PM localization correlates with changes in PIP<sub>2</sub>-PIP<sub>3</sub> levels**

Following these results, we asked whether reversible  $\alpha$ Syn-PIP<sub>2</sub> interactions were present in cells. To answer this question, we transiently overexpressed different PM-targeted PIP phosphatases in A2780 cells and quantified PM localization of endogenous  $\alpha$ Syn by confocal immunofluorescence microscopy (**Figure 3A**). Specifically, we expressed MTM1-mCherry-CAAX, which targets PI(3)P to yield phosphatidylinositol (PI), INPP5E-mCherry-CAAX to produce PI(4)P from PIP<sub>2</sub>, and PTEN-mCherry-CAAX to create PIP<sub>2</sub> from



PI(3,4,5)P<sub>3</sub>, as described<sup>39</sup>. In agreement with our hypothesis, only the conversion of PIP<sub>2</sub> to PI(4)P by INPP5E led to a marked reduction of endogenous  $\alpha$ Syn at the PM (**Figure 3A**). Together with earlier kinase results, these findings corroborated that PM localization of cellular  $\alpha$ Syn was modulated by PIP<sub>2</sub>-specific enzymes. Next, we asked whether signaling-dependent activation of phosphoinositide 3-kinase (PI3K) and concomitant accumulations of the even more negatively-charged phosphatidylinositol 3,4,5-trisphosphate (PIP<sub>3</sub>)<sup>24</sup> led to dynamic changes of  $\alpha$ Syn abundance at the PM. To this end, we employed histamine stimulation of SK-MEL-2 cells that we transiently co-transfected with histamine 1 receptor 1 (H1R) and a PH-domain GFP-fusion construct of the general receptor of phosphoinositides 1 (GRP1) that specifically interacts with cellular PIP<sub>3</sub><sup>40</sup>. Because histamine-mediated PI3K activation also induces time-dependent secondary effects including PIP<sub>2</sub> hydrolysis by PLC<sup>41</sup>, we monitored  $\alpha$ Syn localization and PIP<sub>2</sub>-PIP<sub>3</sub> levels in a time-resolved fashion by fixing SK-MEL-2 cells at 40, 85, 120 and 240 s after histamine addition (**Figure 3B**). After 40 s, we observed an initial increase of PIP<sub>2</sub> and PIP<sub>3</sub> levels at the PM, which was mirrored by greater pools of endogenous  $\alpha$ Syn at basal membrane regions. While PIP<sub>2</sub> levels dropped at intermediate time-points (40-120 s), likely due to PLC-mediated PIP<sub>2</sub> hydrolysis, PIP<sub>3</sub> concentrations were highest at 85 s and leveled off more slowly (120-240 s). Interestingly, PM- $\alpha$ Syn followed the observed PIP<sub>3</sub> behavior in a remarkable similar manner. At later time points (240 s), we noted a significant redistribution of cellular PIP<sub>2</sub> and PIP<sub>3</sub> pools towards the edges of SK-MEL-2 cells, coinciding with the accumulation of bundled Actin fibers and in line with expected PI3K-signaling-dependent rearrangements of the cytoskeleton<sup>24</sup>. Strikingly,  $\alpha$ Syn colocalization with these peripheral PIP<sub>2</sub>-PIP<sub>3</sub> speckles was significantly higher than at earlier time-points (**Figure 3B** and **Figure 3 – figure supplement 1A**). We independently confirmed these results with single time-point measurements by TIRF microscopy (**Figure 3 – figure supplement 1B**). To investigate whether other PI3K pathways caused similar effects, we stimulated SK-MEL-2 with

insulin, which triggers PI3K activation via receptor tyrosine kinase (RTK) signaling<sup>42</sup>. We verified that SK-MEL-2 cells endogenously expressed the insulin-like growth factor receptor 1 $\beta$  (IGFR-1 $\beta$ ) by Western blotting (**Figure 3 – figure supplement 1C**). In support of our hypothesis, we measured increased  $\alpha$ Syn-PM localization by TIRF microscopy upon insulin stimulation for 10 min (**Figure 3 – figure supplement 1D**). Given the short exposure times to histamine and insulin in these experiments, we reasoned that observed PM accumulations likely reflected enhanced recruitment of existing  $\alpha$ Syn pools rather than *de novo* protein synthesis and PM targeting, thus providing further evidence that  $\alpha$ Syn abundance at the PM correlated with signaling-dependent changes of PIP<sub>2</sub> and PIP<sub>3</sub> levels.

## Discussion

Our results establish that clusters of endogenous  $\alpha$ Syn are found at the plasma membrane of human A2780, HeLa, SH-SY5Y and SK-MEL-2 cells, where their native abundance correlates with PIP<sub>2</sub> levels (**Figure 1**). Specifically, we show that targeted overexpression of the PIP<sub>2</sub>-generating kinase PIPKI $\gamma$  increases endogenous  $\alpha$ Syn at the PM (**Figure 1C**), whereas the PIP<sub>2</sub>-specific phosphatase INPP5E reduces the amount of PM  $\alpha$ Syn (**Figure 3A**). We further demonstrate that PIP<sub>3</sub>-dependent histamine and insulin signaling redistributes  $\alpha$ Syn to the PM (**Figure 3B** and **Figure 3 – figure supplement 1**), which collectively suggests that changes in PM PIP<sub>2</sub> and PIP<sub>3</sub> levels affect intracellular  $\alpha$ Syn localization in a dynamic and reversible manner. Aiming for a stringent analysis, we investigated PM interactions at native  $\alpha$ Syn expression levels and in a strictly unaltered sequence context, i.e., without modifying the protein with fluorescent dyes or fusion moieties. These requirements precluded live-cell imaging experiments to determine PM-localization kinetics, although histamine and insulin experiments suggest that endogenous  $\alpha$ Syn pools redistribute readily. Although we cannot rule out that additional secondary protein-protein

interactions contribute to PM targeting, we demonstrate that  $\alpha$ Syn directly interacts with reconstituted PIP<sub>2</sub> vesicles *in vitro* (**Figure 2A-D**). Importantly, the biophysical characteristics of these interactions are indistinguishable from other previously identified, negatively charged membrane systems<sup>29, 31, 43</sup>. Based on the known membrane-binding preferences of  $\alpha$ Syn, PIP<sub>2</sub> and PIP<sub>3</sub> lipids constitute intuitive ligands. Not only because of their highly acidic nature<sup>21</sup>, but also because of the compositions of their acyl chains, containing saturated stearic-(18:0) and polyunsaturated arachidonic-acids (20:4), the latter conferring ‘shallow’ membrane defects<sup>44</sup> ideally suited to accommodate  $\alpha$ Syn’s helical conformations<sup>7, 45</sup>. Thus, from a biophysical point of view, phosphatidylinositol polyphosphates satisfy many of the known requirements for efficient membrane binding. From a biological point of view, PIPs are ubiquitously expressed and stringently required for exocytosis and endocytosis, especially in neurons, where highly abundant PIP<sub>2</sub> and PIP<sub>3</sub> clusters (up to ~6 mol%) mark synaptic vesicle (SV) uptake and release sites<sup>46</sup>. Multiple PIP-binding proteins mediate key steps in SV transmission and recycling<sup>47, 48</sup> and although  $\alpha$ Syn has been implicated in synaptic exocytosis and endocytosis, its role(s) in these processes is ill defined<sup>49</sup>.

A2780, HeLa, SH-SY5Y and SK-MEL-2 cells are poor surrogates for primary neurons and discussing our results in relation to possible scenarios at the synapse is futile. Endogenous levels of  $\alpha$ Syn in the tested cell lines are low, especially in comparison to presynaptic boutons, where  $\alpha$ Syn concentrations reach up to 50  $\mu$ M<sup>50</sup>. Similarly, the abundance of PIP<sub>2</sub> and PIP<sub>3</sub> is much smaller than at presynaptic terminals<sup>46</sup>. Hence,  $\alpha$ Syn-PIP scenarios in the tested cell lines and in synaptic boutons are at opposite ends of protein and lipid concentration scales. Nonetheless, we believe that key conclusions of our study may be generally valid. The affinity of  $\alpha$ Syn to PIP<sub>2</sub>-vesicles has been reported to be in the low  $\mu$ M range<sup>51</sup>, similar to most other reconstituted membrane systems containing negatively-charged phospholipids<sup>5, 23, 29, 30, 31</sup>. In comparison, average dissociation constants for canonical PIP-binding scaffolds such as PH, C2,

FYVE and ENTH domains vary between  $\mu\text{M}$  and  $\text{mM}$ <sup>17, 18</sup>. By contrast, disordered polybasic PIP-binding motifs target negatively-charged membranes with much weaker affinities and in a non-discriminatory fashion based on complementary electrostatic interactions<sup>20</sup>.  $\alpha\text{Syn}$ -PIP binding may define a third class of interactions that are comparable in strength to folded protein domains, but driven, to large parts, by electrostatic contacts similar to those of poly-basic motifs<sup>9</sup>. Based on these affinity considerations, we speculate that  $\alpha\text{Syn}$  may successfully compete for cellular PIP<sub>2</sub>-PIP<sub>3</sub> binding sites with other proteins, especially when their abundance is in a comparable range. For binding scenarios at presynaptic terminals, this is likely the case.

Our findings are additionally supported by recent data showing that intracellular  $\alpha\text{Syn}$  concentrations directly influenced cellular PIP<sub>2</sub> levels and that protein reduction diminished PIP<sub>2</sub> abundance, whereas  $\alpha\text{Syn}$  overexpression increased PIP<sub>2</sub> synthesis and produced significantly elongated axons in primary cortical neurons<sup>52</sup>. Conspicuously, these effects depended on  $\alpha\text{Syn}$ 's ability to interact with membranes and were absent in a membrane-binding deficient mutant<sup>52</sup>. Because plasma membrane expansions require dedicated cycles of endocytosis and exocytosis<sup>53</sup>,  $\alpha\text{Syn}$ -PIP interactions may contribute to both types of processes, as has been suggested earlier<sup>54</sup>. PM-specific  $\alpha\text{Syn}$ -lipid interactions were additionally confirmed by 'unroofing' experiments in related SK-MEL-28 cells<sup>55</sup>, where endogenous protein pools co-localized with members of the exocytosis machinery including the known  $\alpha\text{Syn}$  binding partners Rab3A<sup>56</sup> and synaptobrevin-2/VAMP2<sup>57</sup>. Two other studies implicated  $\alpha\text{Syn}$  and  $\alpha\text{Syn}$ -PIP<sub>2</sub> interactions in clathrin assembly and clathrin-mediated endocytosis, respectively<sup>58, 59</sup>, which further strengthens the notion that phosphatidylinositol polyphosphates contribute to  $\alpha\text{Syn}$  functions at the plasma membrane.

## References

1. Goedert M, Spillantini MG, Del Tredici K, Braak H. 100 years of Lewy pathology. *Nat Rev Neurol* **9**, 13-24 (2013).
2. Sulzer D, Edwards RH. The physiological role of alpha-synuclein and its relationship to Parkinson's Disease. *J Neurochem* **150**, 475-486 (2019).
3. Fusco G, Sanz-Hernandez M, De Simone A. Order and disorder in the physiological membrane binding of alpha-synuclein. *Curr Opin Struct Biol* **48**, 49-57 (2018).
4. Snead D, Eliezer D. Intrinsically disordered proteins in synaptic vesicle trafficking and release. *J Biol Chem* **294**, 3325-3342 (2019).
5. Middleton ER, Rhoades E. Effects of curvature and composition on alpha-synuclein binding to lipid vesicles. *Biophys J* **99**, 2279-2288 (2010).
6. Nuscher B, *et al.* Alpha-synuclein has a high affinity for packing defects in a bilayer membrane: a thermodynamics study. *J Biol Chem* **279**, 21966-21975 (2004).
7. Pranke IM, *et al.* alpha-Synuclein and ALPS motifs are membrane curvature sensors whose contrasting chemistry mediates selective vesicle binding. *J Cell Biol* **194**, 89-103 (2011).
8. Fortin DL, Troyer MD, Nakamura K, Kubo S, Anthony MD, Edwards RH. Lipid rafts mediate the synaptic localization of alpha-synuclein. *J Neurosci* **24**, 6715-6723 (2004).
9. Galvagnion C. The Role of Lipids Interacting with alpha-Synuclein in the Pathogenesis of Parkinson's Disease. *J Parkinsons Dis* **7**, 433-450 (2017).
10. Varkey J, *et al.* Membrane curvature induction and tubulation are common features of synucleins and apolipoproteins. *J Biol Chem* **285**, 32486-32493 (2010).
11. Westphal CH, Chandra SS. Monomeric synucleins generate membrane curvature. *J Biol Chem* **288**, 1829-1840 (2013).
12. Reynolds NP, *et al.* Mechanism of membrane interaction and disruption by alpha-synuclein. *J Am Chem Soc* **133**, 19366-19375 (2011).

13. Fusco G, *et al.* Structural basis of membrane disruption and cellular toxicity by alpha-synuclein oligomers. *Science* **358**, 1440-1443 (2017).
14. Mahul-Mellier AL, *et al.* The process of Lewy body formation, rather than simply alpha-synuclein fibrillization, is one of the major drivers of neurodegeneration. *Proc Natl Acad Sci U S A* **117**, 4971-4982 (2020).
15. Shahmoradian SH, *et al.* Lewy pathology in Parkinson's disease consists of crowded organelles and lipid membranes. *Nat Neurosci* **22**, 1099-1109 (2019).
16. Balla T. Phosphoinositides: tiny lipids with giant impact on cell regulation. *Physiol Rev* **93**, 1019-1137 (2013).
17. Balla T. Inositol-lipid binding motifs: signal integrators through protein-lipid and protein-protein interactions. *J Cell Sci* **118**, 2093-2104 (2005).
18. McLaughlin S, Wang J, Gambhir A, Murray D. PIP(2) and proteins: interactions, organization, and information flow. *Annu Rev Biophys Biomol Struct* **31**, 151-175 (2002).
19. Di Paolo G, De Camilli P. Phosphoinositides in cell regulation and membrane dynamics. *Nature* **443**, 651-657 (2006).
20. McLaughlin S, Murray D. Plasma membrane phosphoinositide organization by protein electrostatics. *Nature* **438**, 605-611 (2005).
21. Kooijman EE, King KE, Gangoda M, Gericke A. Ionization properties of phosphatidylinositol polyphosphates in mixed model membranes. *Biochemistry* **48**, 9360-9371 (2009).
22. Dettmer U. Rationally Designed Variants of alpha-Synuclein Illuminate Its in vivo Structural Properties in Health and Disease. *Front Neurosci* **12**, 623 (2018).
23. Narayanan V, Guo Y, Scarlata S. Fluorescence studies suggest a role for alpha-synuclein in the phosphatidylinositol lipid signaling pathway. *Biochemistry* **44**, 462-470 (2005).

24. Bilanges B, Posor Y, Vanhaesebroeck B. PI3K isoforms in cell signalling and vesicle trafficking. *Nat Rev Mol Cell Biol* **20**, 515-534 (2019).
25. Krauss M, Kukhtina V, Pechstein A, Haucke V. Stimulation of phosphatidylinositol kinase type I-mediated phosphatidylinositol (4,5)-bisphosphate synthesis by AP-2mu-cargo complexes. *Proc Natl Acad Sci U S A* **103**, 11934-11939 (2006).
26. Kunz J, Wilson MP, Kisseleva M, Hurley JH, Majerus PW, Anderson RA. The activation loop of phosphatidylinositol phosphate kinases determines signaling specificity. *Mol Cell* **5**, 1-11 (2000).
27. Davidson WS, Jonas A, Clayton DF, George JM. Stabilization of alpha-synuclein secondary structure upon binding to synthetic membranes. *J Biol Chem* **273**, 9443-9449 (1998).
28. Jo E, McLaurin J, Yip CM, St George-Hyslop P, Fraser PE. alpha-Synuclein membrane interactions and lipid specificity. *J Biol Chem* **275**, 34328-34334 (2000).
29. Bodner CR, Dobson CM, Bax A. Multiple tight phospholipid-binding modes of alpha-synuclein revealed by solution NMR spectroscopy. *J Mol Biol* **390**, 775-790 (2009).
30. Dikiy I, Eliezer D. N-terminal acetylation stabilizes N-terminal helicity in lipid- and micelle-bound alpha-synuclein and increases its affinity for physiological membranes. *J Biol Chem* **289**, 3652-3665 (2014).
31. Fusco G, *et al.* Direct observation of the three regions in alpha-synuclein that determine its membrane-bound behaviour. *Nat Commun* **5**, 3827 (2014).
32. Fusco G, De Simone A, Arosio P, Vendruscolo M, Veglia G, Dobson CM. Structural Ensembles of Membrane-bound alpha-Synuclein Reveal the Molecular Determinants of Synaptic Vesicle Affinity. *Sci Rep* **6**, 27125 (2016).
33. Bartels T, *et al.* The N-terminus of the intrinsically disordered protein alpha-synuclein triggers membrane binding and helix folding. *Biophys J* **99**, 2116-2124 (2010).

34. Lokappa SB, Suk JE, Balasubramanian A, Samanta S, Situ AJ, Ulmer TS. Sequence and membrane determinants of the random coil-helix transition of alpha-synuclein. *J Mol Biol* **426**, 2130-2144 (2014).
35. Maltsev AS, Chen J, Levine RL, Bax A. Site-specific interaction between alpha-synuclein and membranes probed by NMR-observed methionine oxidation rates. *J Am Chem Soc* **135**, 2943-2946 (2013).
36. De Matteis MA, Godi A. PI-loting membrane traffic. *Nat Cell Biol* **6**, 487-492 (2004).
37. Berridge MJ, Irvine RF. Inositol trisphosphate, a novel second messenger in cellular signal transduction. *Nature* **312**, 315-321 (1984).
38. Bilkova E, *et al.* Calcium Directly Regulates Phosphatidylinositol 4,5-Bisphosphate Headgroup Conformation and Recognition. *J Am Chem Soc* **139**, 4019-4024 (2017).
39. Posor Y, *et al.* Spatiotemporal control of endocytosis by phosphatidylinositol-3,4-bisphosphate. *Nature* **499**, 233-237 (2013).
40. Kavran JM, *et al.* Specificity and promiscuity in phosphoinositide binding by pleckstrin homology domains. *J Biol Chem* **273**, 30497-30508 (1998).
41. Saheki Y, *et al.* Control of plasma membrane lipid homeostasis by the extended synaptotagmins. *Nat Cell Biol* **18**, 504-515 (2016).
42. Ruderman NB, Kapeller R, White MF, Cantley LC. Activation of phosphatidylinositol 3-kinase by insulin. *Proc Natl Acad Sci U S A* **87**, 1411-1415 (1990).
43. Perrin RJ, Woods WS, Clayton DF, George JM. Interaction of human alpha-Synuclein and Parkinson's disease variants with phospholipids. Structural analysis using site-directed mutagenesis. *J Biol Chem* **275**, 34393-34398 (2000).
44. Bigay J, Antonny B. Curvature, lipid packing, and electrostatics of membrane organelles: defining cellular territories in determining specificity. *Dev Cell* **23**, 886-895 (2012).



45. Pinot M, *et al.* Lipid cell biology. Polyunsaturated phospholipids facilitate membrane deformation and fission by endocytic proteins. *Science* **345**, 693-697 (2014).
46. James DJ, Khodthong C, Kowalchuk JA, Martin TF. Phosphatidylinositol 4,5-bisphosphate regulates SNARE-dependent membrane fusion. *J Cell Biol* **182**, 355-366 (2008).
47. Di Paolo G, *et al.* Impaired PtdIns(4,5)P<sub>2</sub> synthesis in nerve terminals produces defects in synaptic vesicle trafficking. *Nature* **431**, 415-422 (2004).
48. Milosevic I, *et al.* Plasmalemmal phosphatidylinositol-4,5-bisphosphate level regulates the releasable vesicle pool size in chromaffin cells. *J Neurosci* **25**, 2557-2565 (2005).
49. Huang M, Wang B, Li X, Fu C, Wang C, Kang X. alpha-Synuclein: A Multifunctional Player in Exocytosis, Endocytosis, and Vesicle Recycling. *Front Neurosci* **13**, 28 (2019).
50. Wilhelm BG, *et al.* Composition of isolated synaptic boutons reveals the amounts of vesicle trafficking proteins. *Science* **344**, 1023-1028 (2014).
51. Narayanan V, Scarlata S. Membrane binding and self-association of alpha-synucleins. *Biochemistry* **40**, 9927-9934 (2001).
52. Schechter M, *et al.* A role for alpha-Synuclein in axon growth and its implications in corticostriatal glutamatergic plasticity in Parkinson's disease. *Mol Neurodegener* **15**, 24 (2020).
53. Pfenninger KH. Plasma membrane expansion: a neuron's Herculean task. *Nat Rev Neurosci* **10**, 251-261 (2009).
54. Lautenschlager J, Kaminski CF, Kaminski Schierle GS. alpha-Synuclein - Regulator of Exocytosis, Endocytosis, or Both? *Trends Cell Biol* **27**, 468-479 (2017).
55. Kaur U, Lee JC. Unroofing site-specific alpha-synuclein-lipid interactions at the plasma membrane. *Proc Nat Acad Sci* **in press**, (2020).

56. Chen RH, *et al.* alpha-Synuclein membrane association is regulated by the Rab3a recycling machinery and presynaptic activity. *J Biol Chem* **288**, 7438-7449 (2013).
57. Burre J, Sharma M, Tsetsenis T, Buchman V, Etherton MR, Sudhof TC. Alpha-synuclein promotes SNARE-complex assembly in vivo and in vitro. *Science* **329**, 1663-1667 (2010).
58. Vargas KJ, Colosi PL, Girardi E, Chandra SS.  $\alpha$ -Synuclein facilitates clathrin assembly in synaptic vesicle endocytosis. *bioRxiv*, 2020.2004.2029.069344 (2020).
59. Schechter M, Merav A, Suaad AE, Dana D, Daniel G, Ronit S.  $\alpha$ -Synuclein facilitates endocytosis by elevating the steady-state levels of phosphatidylinositol 4,5-bisphosphate. *bioRxiv*, 2020.2006.2018.158709 (2020).

## Supplementary References

60. Varnai P, Balla T. Visualization of phosphoinositides that bind pleckstrin homology domains: calcium- and agonist-induced dynamic changes and relationship to myo-[3H]inositol-labeled phosphoinositide pools. *J Cell Biol* **143**, 501-510 (1998).
61. Kumar R, *et al.* Activation of transient receptor potential vanilloid 1 by lipoxygenase metabolites depends on PKC phosphorylation. *FASEB J* **31**, 1238-1247 (2017).
62. Hammond GR, Schiavo G, Irvine RF. Immunocytochemical techniques reveal multiple, distinct cellular pools of PtdIns4P and PtdIns(4,5)P(2). *Biochem J* **422**, 23-35 (2009).
63. Dricu A, *et al.* Expression of the insulin-like growth factor 1 receptor (IGF-1R) in breast cancer cells: evidence for a regulatory role of dolichyl phosphate in the transition from an intracellular to an extracellular IGF-1 pathway. *Glycobiology* **9**, 571-579 (1999).
64. Gray A, Van Der Kaay J, Downes CP. The pleckstrin homology domains of protein kinase B and GRP1 (general receptor for phosphoinositides-1) are sensitive and selective probes for the cellular detection of phosphatidylinositol 3,4-bisphosphate

- and/or phosphatidylinositol 3,4,5-trisphosphate in vivo. *Biochem J* **344 Pt 3**, 929-936 (1999).
65. Mizuguchi H, *et al.* Involvement of protein kinase Cdelta/extracellular signal-regulated kinase/poly(ADP-ribose) polymerase-1 (PARP-1) signaling pathway in histamine-induced up-regulation of histamine H1 receptor gene expression in HeLa cells. *J Biol Chem* **286**, 30542-30551 (2011).
  66. Schindelin J, *et al.* Fiji: an open-source platform for biological-image analysis. *Nat Methods* **9**, 676-682 (2012).
  67. Huang L-K, Wang M-JJ. Image thresholding by minimizing the measures of fuzziness. *Pattern Recognition* **28**, 41-51 (1995).
  68. Zonderland J, Wieringa P, Moroni L. A quantitative method to analyse F-actin distribution in cells. *MethodsX* **6**, 2562-2569 (2019).
  69. Grubbs FE. Procedures for Detecting Outlying Observations in Samples. *Technometrics* **11**, 1-21 (1969).
  70. Armstrong RA. When to use the Bonferroni correction. *Ophthalmic Physiol Opt* **34**, 502-508 (2014).
  71. Dunn OJ. Multiple Comparisons Among Means. *Journal of the American Statistical Association* **56**, 52-64 (1961).
  72. Kalpić D, Hlupić N, Lovrić M. Student's t-Tests. In: *International Encyclopedia of Statistical Science* (ed<sup>^</sup>(eds Lovric M). Springer Berlin Heidelberg (2011).
  73. Lee BR, Kamitani T. Improved immunodetection of endogenous alpha-synuclein. *PLoS One* **6**, e23939 (2011).
  74. Johnson M, Coulton AT, Geeves MA, Mulvihill DP. Targeted amino-terminal acetylation of recombinant proteins in E. coli. *PLoS One* **5**, e15801 (2010).
  75. Theillet FX, *et al.* Structural disorder of monomeric alpha-synuclein persists in mammalian cells. *Nature* **530**, 45-50 (2016).

76. Binolfi A, *et al.* Intracellular repair of oxidation-damaged alpha-synuclein fails to target C-terminal modification sites. *Nat Commun* **7**, 10251 (2016).
77. Schanda P, Kupce E, Brutscher B. SOFAST-HMQC experiments for recording two-dimensional heteronuclear correlation spectra of proteins within a few seconds. *J Biomol NMR* **33**, 199-211 (2005).

## Acknowledgments

C.E. was supported by a Swiss National Science Foundation (SNSF) Advanced Postdoc Mobility fellowship P300PA\_160979. P.S. acknowledges funding by the European Research Council (ERC) Consolidator Grant NeuroInCellNMR (647474).

## Materials and Methods

### Mammalian Cell Lines and Growth Media

Human cells lines A2780 (Sigma, cat.# 93112519), HeLa (Sigma, cat.# 93022013), SH-SY5Y (Sigma, cat.# 94030304) and SK-MEL-2 (provided by Ronit Sharon, Hebrew University, Israel) were grown in humidified 5 % (v/v) CO<sub>2</sub> incubators at 37 °C in the following media supplemented with 10% (v/v) fetal bovine serum (FBS): RPMI 1640 (A2780), low glucose DMEM (HeLa), DMEM-Ham's F-12 (SH-SY5Y) and MEM with 1% non-essential amino acids and 2 mM glutamine (SK-MEL-2). Cells were split at 70-80% confluence with a passage number below 20 for all experiments. All cell lines were routinely confirmed to be mycoplasma free.

### Transient Cell Transfections

A2780 cells were seeded on fibronectin (Sigma) coated 25 mm cover slips in 12-well plates at a density of  $3 \times 10^5$  cells. Cells were transfected using Lipofectamine 3000 (Thermo) according to manufacturers' instructions. SK-MEL-2 cells were seeded on 18 mm coverslips at a density of  $2 \times 10^5$  cells and transfected using TransIT-X2 (Mirus Bio) according to manufactures' instructions. Details of plasmids used for transfection are provided in **Table 1**. 1 µg of plasmids was used in all cases. Following transfection, cells were grown for 24 h before analysis.

**Table 1**

| Plasmid                                                                          | Function                                                           | Figure                | Source                                       | Reference |
|----------------------------------------------------------------------------------|--------------------------------------------------------------------|-----------------------|----------------------------------------------|-----------|
| EGFP-PLC $\delta_1$ -PH                                                          | PH domain, binds PI(4,5)P <sub>2</sub> at PM                       | Fig. 1A               | Dr. Michael Krauss (FMP-Berlin, Germany)     | 60        |
| EGFP-phosphatidylinositol 4-phosphate 5-kinase type I $\gamma$ (PIPKI $\gamma$ ) | PIP Kinase, creates PI(4,5)P <sub>2</sub> at PM                    | Fig. 1E, Fig. 1 - S1C | Dr. Michael Krauss (FMP-Berlin, Germany)     | 25        |
| MTM1-mCherry-CAAX                                                                | PIP Phosphatase, acts on PI(3)P. Targeted to PM.                   | Fig. 3A               | Dr. Michael Krauss (FMP-Berlin, Germany)     | 39        |
| INPP5E-mCherry-CAAX                                                              | PIP Phosphatase, acts on PI(4,5)P <sub>2</sub> . Targeted to PM.   | Fig. 3A               | Dr. Michael Krauss (FMP-Berlin, Germany)     | 39        |
| PTEN-mCherry-CAAX                                                                | PIP Phosphatase, acts on PI(3,4,5)P <sub>3</sub> . Targeted to PM. | Fig. 3A               | Dr. Michael Krauss (FMP-Berlin, Germany)     | 39        |
| INPP4A-mCherry-CAAX (mutated)                                                    | PIP Phosphatase dead mutant. Targeted to PM                        | Fig. 3A               | Dr. Michael Krauss (FMP-Berlin, Germany)     | 39        |
| H1R                                                                              | human Histamine 1 receptor                                         | Fig. 3B               | Dr. Ronit Sharon (Hebrew University, Israel) | 61        |
| GRP1-PH pEGFP-C1                                                                 | PH domain binds PI(3,4,5)P <sub>3</sub>                            | Fig. 3B               | Addgene (Plasmid #71378)                     | 40        |

### siRNA Knockdown Experiments

Commercial siRNA mixtures against human  $\alpha$ Syn (Dharmacon, ON-TARGET plus human SNCA, cat.# L-002000-00-0005) and a non-targeted control (cat.# D-001810-10-05) were used. A2780 cells were seeded at a density of  $6 \times 10^5$  cells and transfected with 1.7  $\mu$ g of the respective siRNA mixtures using Lipofectamine 3000 according to manufacturers' instructions. After transfection, cells were grown for 48 h before analysis.

## Immunofluorescence

For immunofluorescence (IF) imaging of endogenous  $\alpha$ Syn and expressed PIP-kinase/phosphatases, cells were washed 3 x 5 min with PBS and fixed in 4 % (w/v) paraformaldehyde (PFA) for 15 min at room temperature (RT). For plasma membrane staining with 5  $\mu$ g/mL Alexa Fluor 350/tetramethylrhodamine conjugated to Wheat Germ Agglutinin (WGA) (Invitrogen), cells were fixed and washed with PBS before application for 10 min at RT. Excess dye was washed off with PBS. For antibody staining, cells were permeabilized with 0.5% Saponin in PBS for 10 min, and blocked with 5% (w/v) bovine serum albumin (BSA, Sigma) in PBS for 30 min. After blocking, cells were incubated with anti- $\alpha$ Syn antibody for 90 min at RT. After washing 3 x 5 min with PBS, cover slips were incubated with Alexa Fluor-tagged secondary antibody for 45 min at RT. Details of antibodies are provided in **Table 2**. Before confocal microscopy cover slips were mounted with Immu-Mount (Thermo), after 3 x 5 min PBS washes. Immunofluorescence detection of PI(4,5)P<sub>2</sub> at the PM was performed according to<sup>62</sup> with slight modifications. A2780 and SK-MEL-2 cells were cultured on fibronectin-coated coverslips and pre-extracted in PHEM buffer (60 mM PIPES, 25 mM HEPES, 5 mM EGTA, 1 mM MgCl<sub>2</sub>) to remove the majority of soluble cytoplasmic proteins. Cells were fixed with 4% PFA and 0.2% glutaraldehyde in PHEM buffer for 15 min at RT. All post-fixation steps until mounting were carried out at 4 °C. Washes were performed with ice-cold PIPES buffer (20 mM PIPES, pH 6.8, 137 mM NaCl, 2.7 mM KCl) to minimize damage to endogenous PIP moieties. Following fixation, cells were washed thrice in PIPES buffer containing 50 mM NH<sub>4</sub>Cl and subsequently blocked and permeabilized in PIPES buffer supplemented with 5% ‘normal goat serum’ and 0.5% Saponin for 30 min. Post blocking, cells were incubated with anti-PI(4,5)P<sub>2</sub> and anti- $\alpha$ Syn antibodies for 60 min, washed thrice and incubated with Alexa Fluor 647 secondary antibody for 45 min. All antibodies used in this study are listed in **Table 2**. Before confocal microscopy, cover slips were mounted with Immu-Mount (Thermo) after 3 x 5 min PIPES buffer washes.

**Table 2**

| Antibody                                                      | Primary | Secondary | Application   | Figure                                                                           | Source                  | Catalog         | Dilution        |
|---------------------------------------------------------------|---------|-----------|---------------|----------------------------------------------------------------------------------|-------------------------|-----------------|-----------------|
| anti- $\alpha$ Syn<br>mouse monoclonal                        | ✓       |           | IF/TIRF<br>WB | Fig. 1A, B, E<br>Fig. 1-S1A<br>S1B, S1C,<br>S1D<br>Fig. 3A<br>Fig. 3-S1B,<br>S1D | Santa Cruz              | sc69977         | 1:200/<br>1:100 |
| anti- $\alpha$ Syn MJFR1<br>rabbit monoclonal                 | ✓       |           | IF/WB         | Fig. 1C, D<br>Fig. 1-S1D<br>Fig. 3B                                              | Abcam                   | ab138501        | 1:10000         |
| anti-PI(4,5)P <sub>2</sub><br>mouse monoclonal                | ✓       |           | IF            | Fig. 1C, D<br>Fig. 3B                                                            | Echelon<br>Biosciences  | Z-P045          | 1:100           |
| anti- $\beta$ Actin<br>mouse monoclonal                       | ✓       |           | WB            | Fig. 1-S1B,<br>S1D<br>Fig. 3-S1C                                                 | Abcam                   | ab6276          | 1:5000          |
| anti-IGF-I<br>Receptor $\beta$<br>rabbit monoclonal           | ✓       |           | WB            | Fig. 3-S1C                                                                       | Cell<br>Signalling      | 9750S           | 1:1000          |
| anti-mouse IgG,<br>Alexa 647 tagged<br>goat polyclonal        |         | ✓         | IF/TIRF       | Fig. 1,<br>Fig. 1-S1C,<br>S1D<br>Fig. 3-S1B,<br>S1D                              | Abcam                   | ab150119        | 1:1000          |
| Anti-rabbit IgG<br>Alexa 555 tagged<br>(donkey<br>polyclonal) |         | ✓         | IF            | Fig. 1C, D<br>Fig. 3B                                                            | Invitrogen              | A-31572         | 1:1000          |
| anti-mouse IgG,<br>HRP conjugated<br>goat polyclonal          |         | ✓         | WB            | Fig. 1-S1A,<br>S1B, S1C,<br>Fig. 3-S1C                                           | Sigma                   | A9917           | 1:10000         |
| anti-rabbit IgG,<br>HRP conjugated<br>goat polyclonal         |         | ✓         | WB            | Fig. 1-S1D<br>Fig. 3-S1C                                                         | Jackson<br>Laboratories | 111-035-<br>003 | 1:5000          |

## Confocal Microscopy

Confocal microscopy imaging was performed on a Nikon Spinning Unit confocal microscope with an oil 60x objective and additional 1.5x magnification. Four channels in 5 optical sections from the basal PM plane were acquired with excitation wavelengths of 405 (blue, 50% laser power, for WGA), 488 (green, 20%, for GFP), 568 (red, 20%, for mCherry) and 647 (far-red, 20%, goat anti-mouse) with 200 ms exposure times. At least 25 images per biological replicate were collected and 3-4 replicates per experiment were analyzed.



## **Total Internal Reflection Fluorescence (TIRF) Microscopy**

For TIRF localization of endogenous  $\alpha$ Syn at the PM, A2780, HeLa, SH-SY5Y and SK-MEL-2 cells were cultured on 18 mm fibronectin-coated coverslips at a density of  $2 \times 10^5$  cells for 24 h and fixed with 4% PFA. After fixation, antibody detection was performed as described in the previous section. Coverslips for TIRF imaging were mounted in PBS after immunostaining and imaged on an Andor Dragonfly Spinning Disc microscope with a TIRF 100 $\times$ /NA 1.45 oil objective. For TIRF detection of PM-proximal fluorescence signals, evanescent fields were kept at 50 nm in all experiments. Four lasers operating at 405 nm (15% laser power), 488 nm (20% laser power), 561 nm (20% laser power) and 647 nm (20% laser power) were used for fluorophore excitation, along with 200 ms exposure times for image acquisitions. At least 20 images per biological replicate were collected and 3 replicates per experiment were analyzed.

## **Histamine and Insulin Stimulation**

PI-3 kinase activity was stimulated either by insulin or histamine addition. For insulin stimulation via the endogenously expressed insulin-like growth factor-1 receptor (IGF-1r)<sup>63</sup>, SK-MEL-2 cells were seeded on coverslips and starved in HBSS for 18 h, as described<sup>64</sup>. 100 nM of insulin was added to cells for 10 min and cells were fixed immediately afterwards. For histamine stimulation, SK-MEL-2 cells were seeded on 18 mm coverslips at a density of  $2 \times 10^5$ , transiently transfected with human histamine 1 receptor (hH1R) and serum-starved for 3 h, as described in<sup>65</sup>. 500  $\mu$ M of histamine was added to cells for 40 s and cells were fixed immediately afterwards. All cell samples were further processed as previously outlined for TIRF procedures. F-Actin was detected by Phalloidin-Alexa Fluor 405 staining (1:400, Invitrogen) during secondary antibody incubation.

## Image Analysis and Quantification

Image analysis and quantification were performed in Fiji<sup>66</sup>. For confocal image quantification, focal planes of apical and basal PMs were selected manually. Images were segmented based on GFP signals by automatic thresholding according to Huang et al<sup>67</sup>. Threshold regions were marked as regions-of-interest (ROIs), copied to the far-red channel ( $\alpha$ Syn IF) and fluorescence intensities were determined. In the box plots of **Figures 1E** and **3A, B**, each ROI corresponds to a single cell and is represented as a data point. For TIRF data in **Figure 3 – figure supplement 1B** and **1D**, images were segmented based on Phalloidin signals via automated thresholding using the default algorithm in Fiji<sup>68</sup>. Different than for confocal images in **Figures 1** and **3**, TIRF ROIs consist of multiple adjacent cells in a single frame that were copied to the far-red channel ( $\alpha$ Syn IF). ROIs of less than 2  $\mu\text{m}^2$  in size were excluded. The Fiji particle counting routine was used to determine the number of  $\alpha$ Syn puncta in each ROI. The number of cells in each image was determined manually based on cell outlines marked by Phalloidin. In **Figure 3 – figure supplement 1B** and **1D**, data points in box plots were calculated by dividing the number of  $\alpha$ Syn puncta per image by the cell count. All box plots depict median values (center lines) with box dimensions representing the 25<sup>th</sup> and 75<sup>th</sup> percentiles. Whiskers extend to 1.5-times the interquartile range and depict the 5<sup>th</sup> and 95<sup>th</sup> percentiles. Each box plot in **Figures 1A** and **3A** corresponds to 110-120 data points combined from three independent biological replicates. Box plots in **Figure 3B** contain data points collected per cell (n=80) from a single experiment but representative of three independent experiments with similar results. Box plots in **Figure 3 – figure supplement 1B** and **1D** contain data points from approximately 120 cells, combined from three independent biological replicates.

## Statistical Analysis

For box plots, data points considered ‘outliers’ were determined based on criteria defined in the Grubbs outlier test<sup>69</sup> and omitted. ANOVA tests with Bonferroni’s post-tests<sup>70, 71</sup> were used to determine the statistical significance of experiments with more than two samples, whereas Student’s *t* tests were performed to assess statistical differences between samples<sup>72</sup>. Significance is given as \**P* < 0.05; \*\**P* < 0.01; \*\*\**P* < 0.001.

## Cell Lysate Preparation

Lysates of A2780, HeLa, SH-SY5Y, SK-MEL-2 cell lines were prepared by detaching ~5-10 million cells with trypsin/EDTA (0.05% / 0.02%) and harvested by centrifugation at 130 x g for 5 min at 25 °C. Sedimented cells were washed once with PBS, counted on a haemocytometer and pelleted again by centrifugation. After resuspending cells in PBS with proteinase inhibitor cocktail (Roche), yielding a cell count of  $2 \times 10^7$  cells /ml, they were lysed by repeated freeze-thaw cycles. Lysates were cleared by centrifugation at 16000 x g for 30 min. Supernatants were removed, total protein concentration measured with a BCA assay kit (Thermo) and 50 µg of protein (per lane) was applied onto SDS-PAGE for western blotting.

## Western Blotting

Cell lysates and recombinant protein samples were boiled in Laemmli buffer for 10 min before SDS-PAGE separation on commercial, precast 4-18% gradient gels (BioRad). Recombinant N-terminally acetylated  $\alpha$ -,  $\beta$ - and  $\gamma$ -Syn, at specified concentrations were loaded as reference inputs (see Protein Expression and Purification). Proteins were transferred onto PVDF membranes and fixed with 4% (w/v) paraformaldehyde (PFA) in PBS for 1 h<sup>73</sup>. Membranes were washed 2x with PBS, 2x with tris-buffered saline with 0.1 % tween 20 (TBST) and blocked in 5% milk-TBST for 1 h. After blocking, the blots were incubated with primary antibodies overnight at 4 °C. Membranes were then washed and

probed with HRP-conjugated secondary antibodies for 1 h. The antibodies used for each blot is provided in **Table 2**. Membranes were developed using the SuperSignal West Pico Plus reagent (Thermo) and luminescence signals were detected on a BioRad Molecular Imager.

### **Western Blot Quantification**

Intensities of  $\alpha$ Syn and  $\beta$ -Actin bands were quantified using the ImageLab software (BioRad).  $\alpha$ Syn reference input was used to generate a standard curve. For cell lysate samples,  $\alpha$ Syn intensity was normalized according to the  $\beta$ -Actin signal and cell lysate were calculated with respect to the  $\alpha$ Syn standard curve. Error bars denote background signal (noise).

### **Recombinant Protein Expression and Purification**

$^{15}\text{N}$  isotope-labeled, N-terminally acetylated, human wild-type  $\alpha$ -,  $\beta$ - and  $\gamma$ -Syn were produced by co-expressing PT7-7 plasmids with yeast N-acetyltransferase complex B (NatB)<sup>74</sup> in *Escherichia coli* BL21 Star (DE3) cells using M9 minimal media supplemented with 0.5 g/L of  $^{15}\text{NH}_4\text{Cl}$  (Sigma). Protein purification under non-denaturing conditions was performed as described previously<sup>75</sup>.  $\alpha$ Syn mutants  $\Delta\text{N}$  and F4A-Y39A were generated by site-directed mutagenesis (QuikChange, Agilent) and confirmed by DNA sequencing. Recombinant protein expression and purification of  $\alpha$ Syn F4A-Y39A was identical to wild-type  $\alpha$ Syn. Lacking the N-terminal substrate specificity for NatB,  $\alpha$ Syn  $\Delta\text{N}$  was produced in its non-acetylated form and purified as the wild-type protein. Methionine-oxidized  $^{15}\text{N}$  isotope-labeled wild-type  $\alpha$ Syn was expressed and purified as described<sup>76</sup>. Protein samples were concentrated to 1-1.2 mM in NMR buffer (25 mM sodium phosphate, 150 mM NaCl) at pH 7.0. Protein concentrations were determined spectrophotometrically by UV absorbance measurements at 280 nm with  $\epsilon = 5690 \text{ M}^{-1}\text{cm}^{-1}$  for  $\alpha$ -,  $\beta$ -Syn  $\Delta\text{N}$ , and methionine-oxidized

$\alpha$ Syn. For  $\alpha$ Syn F4A-Y39A and  $\gamma$ -Syn,  $\epsilon = 4470$  and  $1490 \text{ M}^{-1}\text{cm}^{-1}$  were used. Final aliquots of protein stock solutions were snap frozen in liquid nitrogen and stored at  $-80 \text{ }^\circ\text{C}$  until use.

### Reconstituted PI(4,5)P<sub>2</sub> Vesicles

Phospholipids were purchased from Avanti Polar Lipids. Small unilamellar vesicles (SUVs) were prepared from 100% brain (porcine) phosphatidylinositol 4,5-bisphosphate (PIP<sub>2</sub>). A thin lipid film was formed in a glass vial by gently drying 1 mg of PIP<sub>2</sub> in chloroform-methanol under a stream of nitrogen. To remove residual traces of organic solvents, the lipid film was placed under vacuum overnight. 0.5 mL NMR buffer was then added to hydrate the lipid film for 1 hour at RT while agitating. After 5 freeze-thaw cycles on dry ice and incubation in a water bath at RT, the lipid suspension was sonicated at  $4 \text{ }^\circ\text{C}$  for 20 min at 30% power setting (Bandelin). Resulting PIP<sub>2</sub> SUVs (2 mg/mL) were used immediately.  $\alpha$ Syn:PIP<sub>2</sub> molar ratios for sample preparations were calculated using a PIP<sub>2</sub> lipid mass of 1096 Da. For PIP<sub>2</sub> titration experiments, 1, 5, 10, 15, 20, and 30-fold molar excess of lipids was added to  $60 \text{ }\mu\text{M}$  of <sup>15</sup>N isotope-labeled, N-terminally acetylated  $\alpha$ Syn (total volume  $120 \text{ }\mu\text{L}$ ) and  $\alpha$ Syn PIP<sub>2</sub> samples were incubated for 45 min at RT before NMR and CD measurements. Following the same procedure, mixed phosphatidylcholine phosphatidylinositol-4,5 bisphosphate (PC:PIP<sub>2</sub>, 9:1) suspensions were prepared using 9 mg of 1,2-dioleoyl-sn-glycero-3-phosphocholine (DOPC, 786 Da) and 1 mg PIP<sub>2</sub>. The dried lipid film was hydrated with 0.25 mL NMR buffer. The PC-PIP<sub>2</sub> suspension was then extruded through polycarbonate membranes with a pore size of 100 nm according to manufacturer's instructions (mini-extruder, Avanti Polar Lipids) and resulting PC-PIP<sub>2</sub> large unilamellar vesicles LUVs (40 mg/mL) were used immediately. For sample preparations, an average PC-PIP<sub>2</sub> lipid mass of  $\sim 820 \text{ Da}$  ( $0.9 \times 786 \text{ Da} + 0.1 \times 1096 \text{ Da}$ ) was used to calculate the  $\alpha$ Syn:PC-PIP<sub>2</sub> molar ratios. <sup>15</sup>N isotope-labeled, N-terminally acetylated  $\alpha$ Syn ( $60 \text{ }\mu\text{M}$ ) was incubated with 80, 170, 340, and 680-fold molar excess of total

PC-PIP<sub>2</sub> lipids.  $\alpha$ Syn PC-PIP<sub>2</sub> samples (total volume 120  $\mu$ L) were incubated for 45 min at RT before CD, NMR, and DLS experiments. Inositol hexaphosphate (IP<sub>6</sub>) was provided by Dr. Dorothea Fiedler, Chemical Biology Department, Leibniz-Forschungsinstitut für Molekulare Pharmakologie, Berlin. Before NMR measurements, 60  $\mu$ M  $\alpha$ Syn was incubated with 150  $\mu$ M IP<sub>6</sub> in NMR buffer (total volume 120  $\mu$ L) for 45 min at RT.

### **Phospholipase C Reaction**

Phospholipase C (PLC) was purchased from Sigma and the lyophilized powder was dissolved in NMR buffer at 1000 units (U)/mL.  $\alpha$ Syn PC-PIP<sub>2</sub> samples at 680-fold molar excess of PC-PIP<sub>2</sub> lipids (60  $\mu$ M  $\alpha$ Syn, 40 mM PC-PIP<sub>2</sub>) were incubated while agitating at 37 °C for 45 min with 10 U of PLC and 1 mM PMSF in a total volume of 120  $\mu$ L yielding a PLC activity of ~80 mM per min.

### **PIP Array**

Western blot detection of  $\alpha$ Syn binding to immobilized PIPs was carried out on a commercial membrane spotted with different concentrations of PI, PI(3)P, PI(4)P, PI(5)P, PI(3,4)P<sub>2</sub>, PI(4,5)P<sub>2</sub>, PI(3,5)P<sub>2</sub> and PI(3,4,5)P<sub>3</sub> (Echelon Biosciences). The membrane was incubated with recombinant, N-terminally acetylated  $\alpha$ Syn (50  $\mu$ g) according to manufacturer's instructions. After washing, bound  $\alpha$ Syn was detected with the  $\alpha$ Syn antibody sc69977 (dilution 1:200, **Table 2**). Secondary antibody binding and HRP detection was carried out as described for Western Blotting.

### **Nuclear Magnetic Resonance (NMR) Spectroscopy**

For best comparison of protein reference and  $\alpha$ Syn-lipid NMR data, final concentrations of <sup>15</sup>N isotope-labeled, N-terminals acetylated  $\alpha$ Syn samples were adjusted to 60  $\mu$ M,

supplemented with 5% D<sub>2</sub>O and measured in 3 mm (diameter) Shigemi tubes in all cases. NMR experiments were acquired on a Bruker 600 MHz Avance spectrometer equipped with a cryogenically cooled proton-optimized <sup>1</sup>H{<sup>13</sup>C/<sup>15</sup>N} TCI probe. Reference and αSyn-lipid NMR spectra were acquired with identical spectrometer settings and general acquisition parameters. Specifically, we employed 2D <sup>1</sup>H-<sup>15</sup>N SOFAST HMQC NMR pulse-sequences<sup>77</sup> with a data size of 128 x 512 complex points for a sweep width (SW) of 28.0 ppm (<sup>15</sup>N) and 16.7 ppm (<sup>1</sup>H), 128 scans, 60 ms recycling delay, recorded at 283 K. Inspection of the highly pH-sensitive His50 <sup>1</sup>H-<sup>15</sup>N chemical shift indicated that the sample pH changed from 7 to 6.5 during the PLC reaction (**Figure 2E**). To accurately delineate I/I<sub>0</sub> values, we recorded reference NMR spectra at pH 6.5. All NMR spectra were processed with PROSA, zero-filled to four times the number of real points and processed without window function. Visualization and data analysis were carried out in CARRA. NMR signal intensity ratios (I/I<sub>0</sub>) of isolated αSyn (I<sub>0</sub>) and in the presence lipids (I) were determined for each residue by extracting maximal signal peak heights in the respective 2D <sup>1</sup>H-<sup>15</sup>N NMR spectra.

### **Circular Dichroism (CD) Spectroscopy**

NMR samples of isolated αSyn and αSyn in presence of lipid vesicles were diluted with NMR buffer to a final protein concentration of 10 μM for CD measurements. CD spectra (200-250 nm) were collected on a Jasco J-720 CD spectropolarimeter in a 1 mm quartz cell at 25 °C. One replicate per sample was recorded. Six scans were averaged and blank samples (without αSyn) were subtracted from the protein spectra to calculate the mean residue weight ellipticity (θ<sub>MRW</sub>).

### **Dynamic Light Scattering (DLS)**

DLS measurements were acquired on a Zetasizer Nano ZS (Malvern Instruments) operating at a laser wavelength of 633 nm equipped with a Peltier temperature controller set

to 25 °C. Data were collected on all NMR samples containing  $\alpha$ Syn, isolated PC-PIP<sub>2</sub> vesicles, and PC-PIP<sub>2</sub> vesicles in presence of Ca<sup>2+</sup> and PLC, respectively. Using the Malvern DTS software, mean hydrodynamic diameters were calculated from three replicates of the same sample in the intensity-weighted mode.

### **Negative-Stain Electron Microscopy (EM)**

NMR samples of  $\alpha$ Syn at 30- and 680-fold molar excess of PIP<sub>2</sub> and PC-PIP<sub>2</sub> lipids were diluted to a protein concentration of ~10  $\mu$ M in NMR buffer. 5  $\mu$ L aliquots were added to glow-discharged carbon-coated copper grids for 1 min. Excess liquid was removed with filter paper and grids were washed twice with H<sub>2</sub>O before staining with 2% (w/v) uranyl acetate for 15 s. Negative stain, transmission EM images were acquired on a Technai G2 TEM.



## Figure Legends

**Figure 1. PM localization of endogenous  $\alpha$ Syn.** (A) Immunofluorescence detection of endogenous  $\alpha$ Syn in A2780 cells by confocal microscopy. Plasma membranes (PM) stained with tetramethylrhodamine-WGA (left panel) or identified via PLC $\delta$ -PH-GFP (right panel). Representative apical and basal confocal planes are shown. Scale bars are 2  $\mu$ m (left) and 10  $\mu$ m (right). (B)  $\alpha$ Syn-PM localization in A2780 cells following control (si NT) and targeted siRNA (si  $\alpha$ Syn) knockdown. Phalloidin staining of F-Actin marks cell boundaries. Scale bars are 10  $\mu$ m. (C) Immunofluorescence detection of endogenous  $\alpha$ Syn and PIP<sub>2</sub> at the PM. Scale bars are 5  $\mu$ m. (D) Spatially resolved  $\alpha$ Syn (green) and PIP<sub>2</sub> (red) fluorescence intensity profiles across the dotted lines in the closeup views of (C). Resolved  $\alpha$ Syn and PIP<sub>2</sub> traces are marked with arrowheads in (C). (E)  $\alpha$ Syn-PM localization and quantification after transient GFP or GFP-PIPKI $\gamma$  overexpression in A2780 and HeLa cells. GFP-fluorescence identifies transfected cells. Scale bars are 10  $\mu$ m. Box plots for  $\alpha$ Syn immunofluorescence quantification. Data points represent  $n = \sim 120$  cells collected in four independent replicate experiments. Box dimensions represent the 25<sup>th</sup> and 75<sup>th</sup> percentiles, whiskers extend to the 5<sup>th</sup> and 95<sup>th</sup> percentiles. Data points beyond these values were considered outliers. Significance based on Student's  $t$  tests as (\*\*\*)  $P < 0.001$ .

**Figure 2.  $\alpha$ Syn binding to reconstituted PIP<sub>2</sub>-vesicles.** (A) Circular dichroism (CD) spectrum and negative-stain electron micrograph of  $\alpha$ Syn-bound PIP<sub>2</sub> vesicles (100 %). Scale bar is 100 nm. (B) Overlay of 2D <sup>1</sup>H-<sup>15</sup>N NMR spectra of isolated  $\alpha$ Syn in buffer (black) and bound to PIP<sub>2</sub> vesicles (green). Remaining signals of C-terminal  $\alpha$ Syn residues are labeled. (C) CD spectra of  $\alpha$ Syn bound to PC-PIP<sub>2</sub> vesicles at increasing lipid-to-protein ratios (inset) and negative-stain electron micrograph of the  $\alpha$ Syn:PC-PIP<sub>2</sub> (1:50 protein:PIP<sub>2</sub>) sample. Scale bar

is 100 nm. **(D)** NMR signal intensity blots of bound (I) over unbound ( $I_0$ )  $\alpha$ Syn in the presence of different amounts of PC-PIP<sub>2</sub> vesicles (equivalent to (C)). Only residues 1-40 are shown. **(E)**  $I/I_0$  of free ( $I_0$ ) versus PC-PIP<sub>2</sub> bound  $\alpha$ Syn at 1:50 (green, I) and after addition of PLC (dark grey) and Ca<sup>2+</sup> (light grey). Selected region of 2D <sup>1</sup>H-<sup>15</sup>N NMR spectra of PC-PIP<sub>2</sub> bound  $\alpha$ Syn (left), and in presence of PLC and Ca<sup>2+</sup> (right). Vesicle release of N-terminal  $\alpha$ Syn residues and reappearance of corresponding NMR signals are indicated for D2 (exemplary). **(F)** Hydrodynamic diameters of  $\alpha$ Syn-bound PC-PIP<sub>2</sub> vesicles before (green) and after PLC (dark grey) and Ca<sup>2+</sup> (light grey) addition by dynamic light scattering (DLS). Errors were calculated based on measurements on three independent replicate samples.

**Figure 3. Reversible  $\alpha$ Syn-PM localization.** **(A)** Representative immunofluorescence localization of  $\alpha$ Syn at basal A2780 PM planes by confocal microscopy. Cells transiently express different PM-targeted, mCherry-tagged PIP phosphatases, with mCherry fluorescence indicating successful transfection and phosphatase expression. A phosphatase-inactivated null mutant serves as the negative control (left). Box plots of  $\alpha$ Syn immunofluorescence quantification are shown on the right. ~120 data points were collected per cell (n=120) in four independent replicate experiments. Box dimensions represent the 25<sup>th</sup> and 75<sup>th</sup> percentiles, whiskers extend to the 5<sup>th</sup> and 95<sup>th</sup> percentiles. Data points beyond these values were considered outliers. Significance based on ANOVA tests with Bonferroni's post-tests as (\*\*\*)P < 0.001; (\*\*)P < 0.01. **(B)** Time-course experiments following histamine stimulation of SK-MEL-2 cells transiently expressing hH1R and GRP1-PH pEGFP-C1. Immunofluorescence detection of endogenous PIP<sub>2</sub> and  $\alpha$ Syn by confocal microscopy of basal PM regions. GRP1-PH GFP-signals report on the presence of PIP<sub>3</sub>. Phalloidin staining of F-Actin marks cell boundaries. Scale bar is 10  $\mu$ m. Box plots represent data points collected per cell (n=80) from a single

experiment, but representative of three independent experiments with similar results. Significance based on Student's *t* tests as (\*\*) $P < 0.01$ ; (\*\*\*) $P < 0.001$ .

## Supplementary Figure Legends

**Figure 1 – Supplementary Figure 1.** (A) Western Blot to determine the specificity of the  $\alpha$ Syn antibody (sc69977) against  $\beta$  and  $\gamma$  isoforms of the protein. (B) Western blot of A2780 lysates of control (si NT) and targeted siRNA (si  $\alpha$ Syn) knockdown cells. Recombinant N-terminally acetylated  $\alpha$ Syn serves as input-,  $\beta$ -Actin as loading-controls. (C) Immunofluorescence localization of endogenous  $\alpha$ Syn in SH-SY5Y cells transfected with GFP or PH-GFP-PIPKI $\gamma$ . (D) Total internal reflection (TIRF) fluorescence-microscopy of  $\alpha$ Syn-PM localization in A2780, HeLa, SH-SY5Y and SK-MEL-2 cells. PM stained with tetramethylrhodamine-WGA. Scale bars are 10  $\mu$ m. Western blot of endogenous  $\alpha$ Syn in respective cell lysates. Recombinant N-terminally acetylated  $\alpha$ Syn serves as input-,  $\beta$ -Actin as loading-controls. Bar graphs denote Western blot quantifications of  $\alpha$ Syn with signals normalized against  $\beta$ -Actin. Error bars denote standard deviations based on measured background signals.

**Figure 2 – Supplementary Figure 1.** (A) Overlay of 2D  $^1\text{H}$ - $^{15}\text{N}$  NMR spectra of isolated, N-terminally acetylated  $\alpha$ Syn (black) and bound to a 30-fold molar excess of PIP $_2$ -only vesicles (green). Uniform signal broadening of N-terminal residues 1-100 is evident. Observable signals of C-terminal  $\alpha$ Syn residues 100-140 are labeled. (B) Selected region of 2D  $^1\text{H}$ - $^{15}\text{N}$  NMR spectra of  $\alpha$ Syn upon addition of increasing amounts of PIP $_2$ -only vesicles, corresponding to molar protein:lipid ratios of 1:1, 1:5, 1:10, 1:15, 1:20 and 1:30, with M1 labeled in green and E137 indicated in orange. Note that A107 (red) at the border between membrane-bound (N-terminal) and -unbound (C-terminal)  $\alpha$ Syn residues displays peak-splitting at increasing PIP $_2$

concentrations, indicative of chemical shift differences between free and membrane-bound protein states. (C) Residue-resolved signal attenuation profiles ( $I/I_0$ ) of free ( $I_0$ ) versus PIP<sub>2</sub> bound (I)  $\alpha$ Syn, at previously indicated molar ratios. Positions of C-terminal  $\alpha$ Syn proline residues without peptide amide resonances are shown in the three-letter amino acid code.

**Figure 2 – Supplementary Figure 2.** (A) Hydrodynamic diameters of PC-PIP<sub>2</sub> vesicles in the absence (dashed grey) and presence of  $\alpha$ Syn (green) at a protein:lipid ratio of 1:50 by DLS measurements. Errors were calculated based on measurements of three independent replicate samples. (B) Selected region of 2D <sup>1</sup>H-<sup>15</sup>N NMR spectra of isolated, N-terminally acetylated  $\alpha$ Syn (black) and in the presence of 6, 13, 25, 50 mol equivalents of PC-PIP<sub>2</sub> vesicles (blue to green). Site-selective line broadening of N-terminal residues 1-10 is highlighted. Residue-resolved signal attenuation profiles ( $I/I_0$ ) of free ( $I_0$ ) versus PC-PIP<sub>2</sub> bound (I)  $\alpha$ Syn at previously indicated molar ratios. Positions of C-terminal  $\alpha$ Syn proline residues without peptide amide resonances are shown in the three-letter amino acid code.

**Figure 2 – Supplementary Figure 3.** (A) Selected regions of 2D <sup>1</sup>H-<sup>15</sup>N NMR spectra. Left to right: Overlay of isolated, N-terminally acetylated wild-type (WT)  $\alpha$ Syn and bound to PC-PIP<sub>2</sub> vesicles at a protein:lipid ratio of 1:50 (green). NMR spectra of N-terminally truncated  $\alpha$ Syn lacking residues 1-5 ( $\Delta$ N), mutated (F4A-Y39A) and methionine-oxidized (MetOx)  $\alpha$ Syn in the presence of PC-PIP<sub>2</sub> vesicles (1:50). (B) Chemical structures and reaction scheme of phospholipase C (PLC) mediated PIP<sub>2</sub> hydrolysis. (C) Overlay of selected regions of 2D <sup>1</sup>H-<sup>15</sup>N NMR spectra of  $\alpha$ Syn bound to PC-PIP<sub>2</sub> vesicles (1:50) before (green) and after PLC hydrolysis (dark grey). N-terminal residues 1-10 are highlighted. Corresponding residue-resolved signal attenuation profiles ( $I/I_0$ ) of free versus PC-PIP<sub>2</sub> vesicle-bound  $\alpha$ Syn before

(green) and after PLC hydrolysis (dark grey). Positions of C-terminal  $\alpha$ Syn proline residues without peptide amide resonances are shown in the three-letter amino acid code.

**Figure 2 – Supplementary Figure 4.** (A) Overlay of 2D  $^1\text{H}$ - $^{15}\text{N}$  NMR spectra of PC-PIP<sub>2</sub> vesicle-bound  $\alpha$ Syn in the absence (green) and presence of Ca<sup>2+</sup> (light grey). Residue-resolved NMR signal intensities ratios ( $I/I_0$ ) of free  $\alpha$ Syn versus PC-PIP<sub>2</sub> vesicle-bound  $\alpha$ Syn (I) with (green) and without Ca<sup>2+</sup> (light grey). Positions of C-terminal  $\alpha$ Syn proline residues without peptide amide resonances are shown in the three-letter amino acid code. (B) Hydrodynamic diameters of free and  $\alpha$ Syn-bound PC-PIP<sub>2</sub> vesicles (1:50) in the presence of Ca<sup>2+</sup> (light grey) or PLC (dark grey) by DLS experiments. Errors were calculated based on measurements of three independent replicate samples. (C) 2D  $^1\text{H}$ - $^{15}\text{N}$  NMR spectrum of  $\alpha$ Syn in presence of free IP<sub>6</sub>. N-terminal residues 1-10 are highlighted.

**Figure 3 – Supplementary Figure 1.** (A) Spatially-resolved fluorescence intensity profiles of  $\alpha$ Syn (green), PIP<sub>2</sub> (red) and GRP1-PH GFP/PIP<sub>3</sub> (blue) signals at the PM at indicated time points following histamine stimulation. Individual traces span extracellular and intracellular portions of analyzed cells. PM regions are indicated by grey boxes. (B) and (D) Immunofluorescence localization of endogenous  $\alpha$ Syn in SK-MEL-2 cells by TIRF-microscopy, counterstained with Phalloidin for F-Actin to mark cell boundaries. Cells were stimulated with histamine (B) or insulin (D). Quantification of  $\alpha$ Syn signals at basal PM regions with and without stimulation shown on the right. Box plots represent data points collected from  $n = \sim 120$  cells combined from three independent replicate experiments. Significance based on Student's  $t$  tests as (\*\*) $P < 0.01$ ; (\*\*\*) $P < 0.001$ . Scale bars are 10  $\mu\text{m}$ . (C) Western blot of SK-MEL-2 and HEK 293 cell lysates showing the presence of endogenous insulin like growth factor receptor  $\beta$  (IGF-R $\beta$ ).  $\beta$ -Actin serves as loading-control.

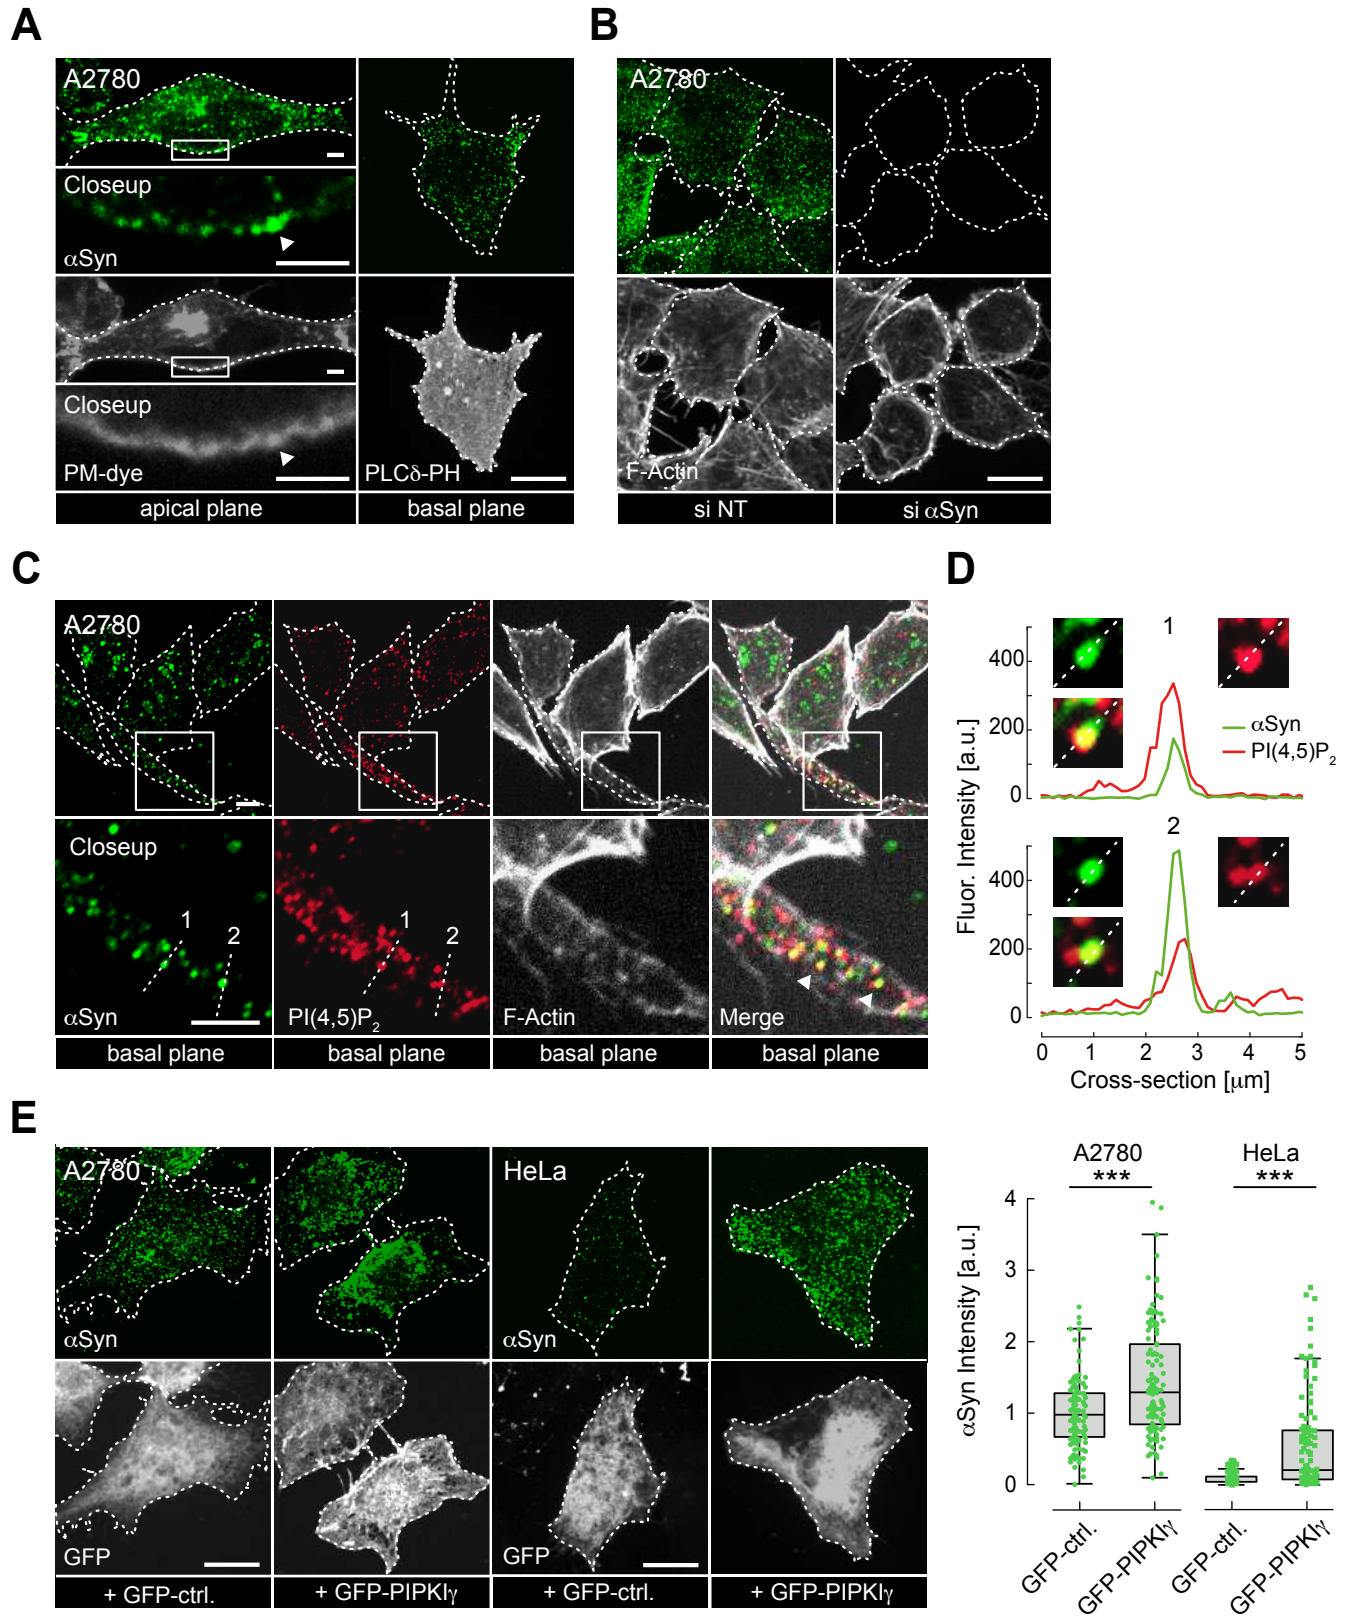



## Figure 2

Eichmann *et al.*

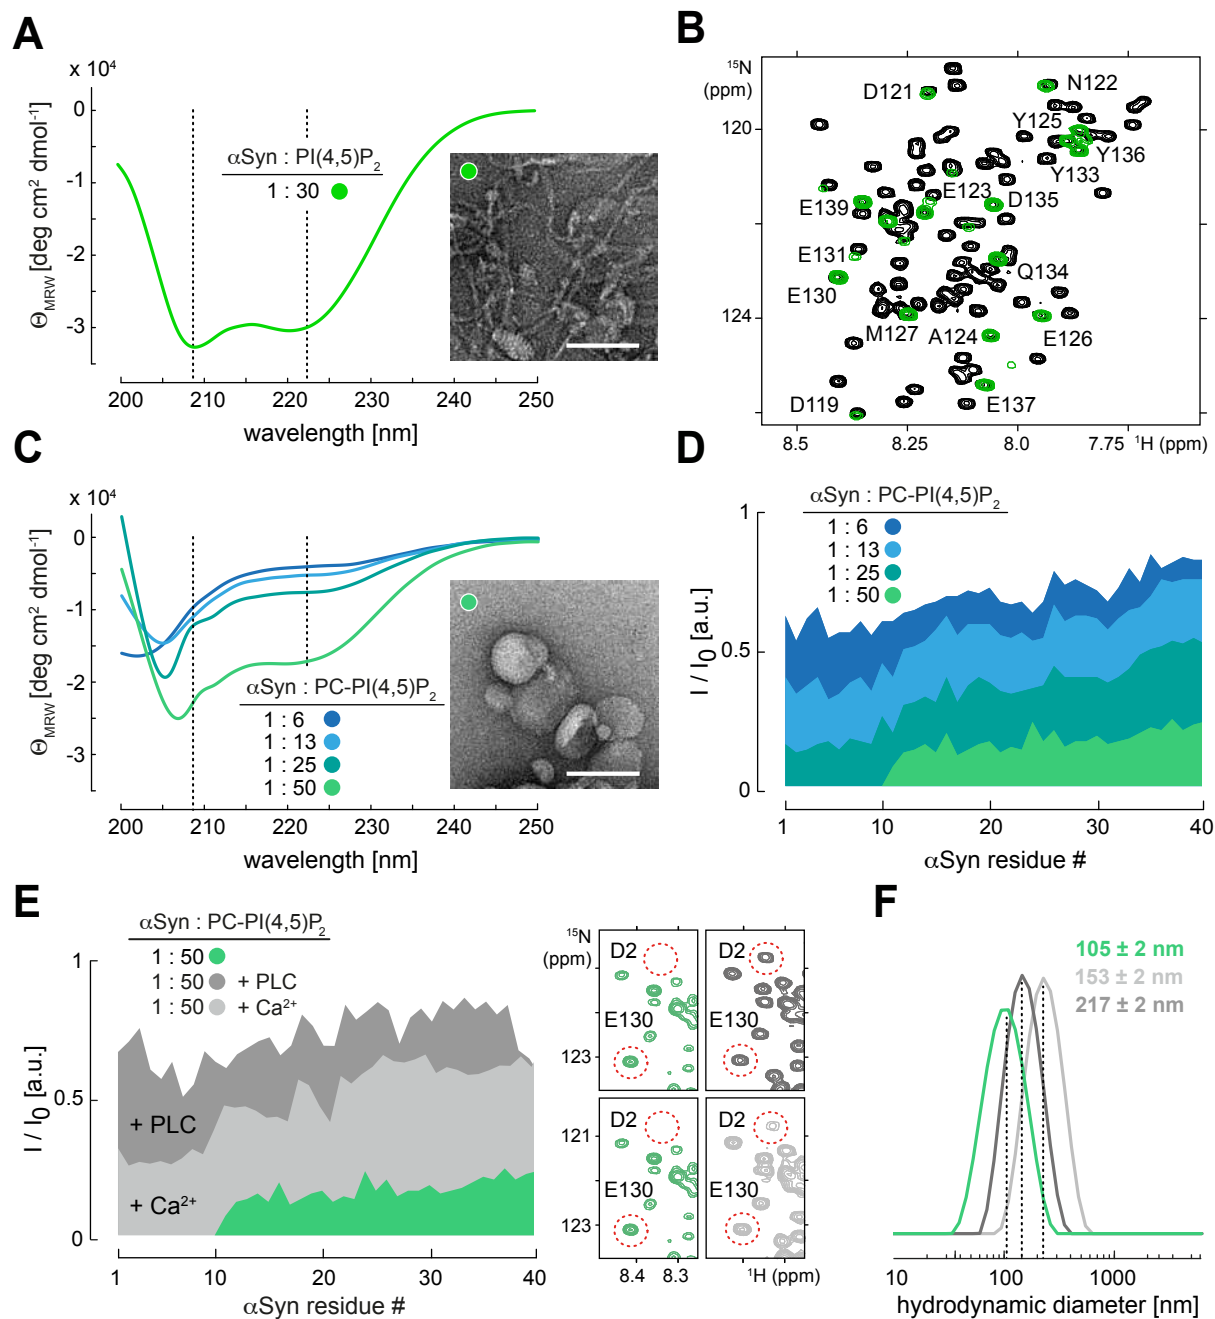

**A**

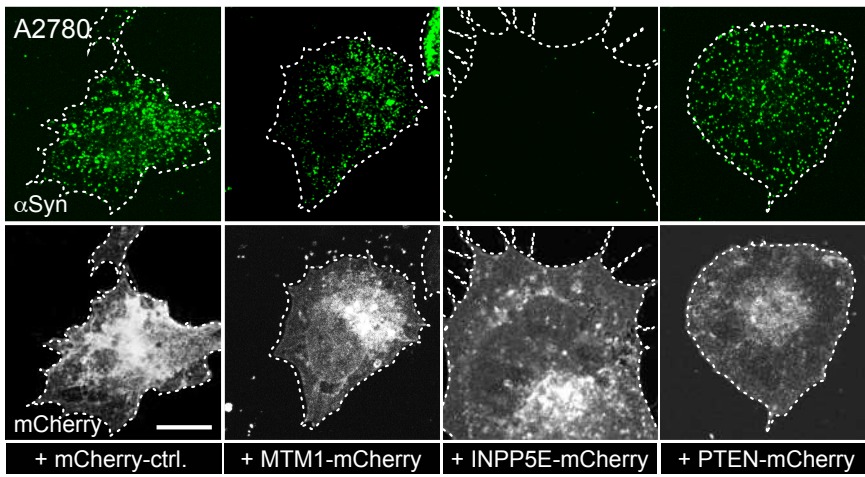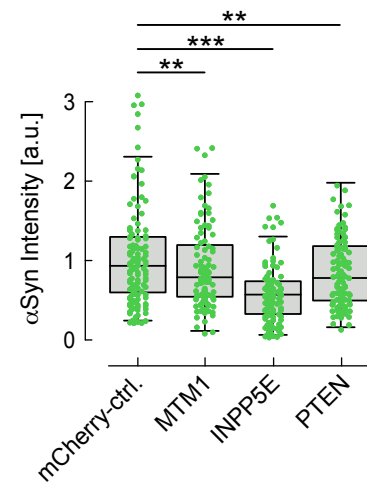

**B**

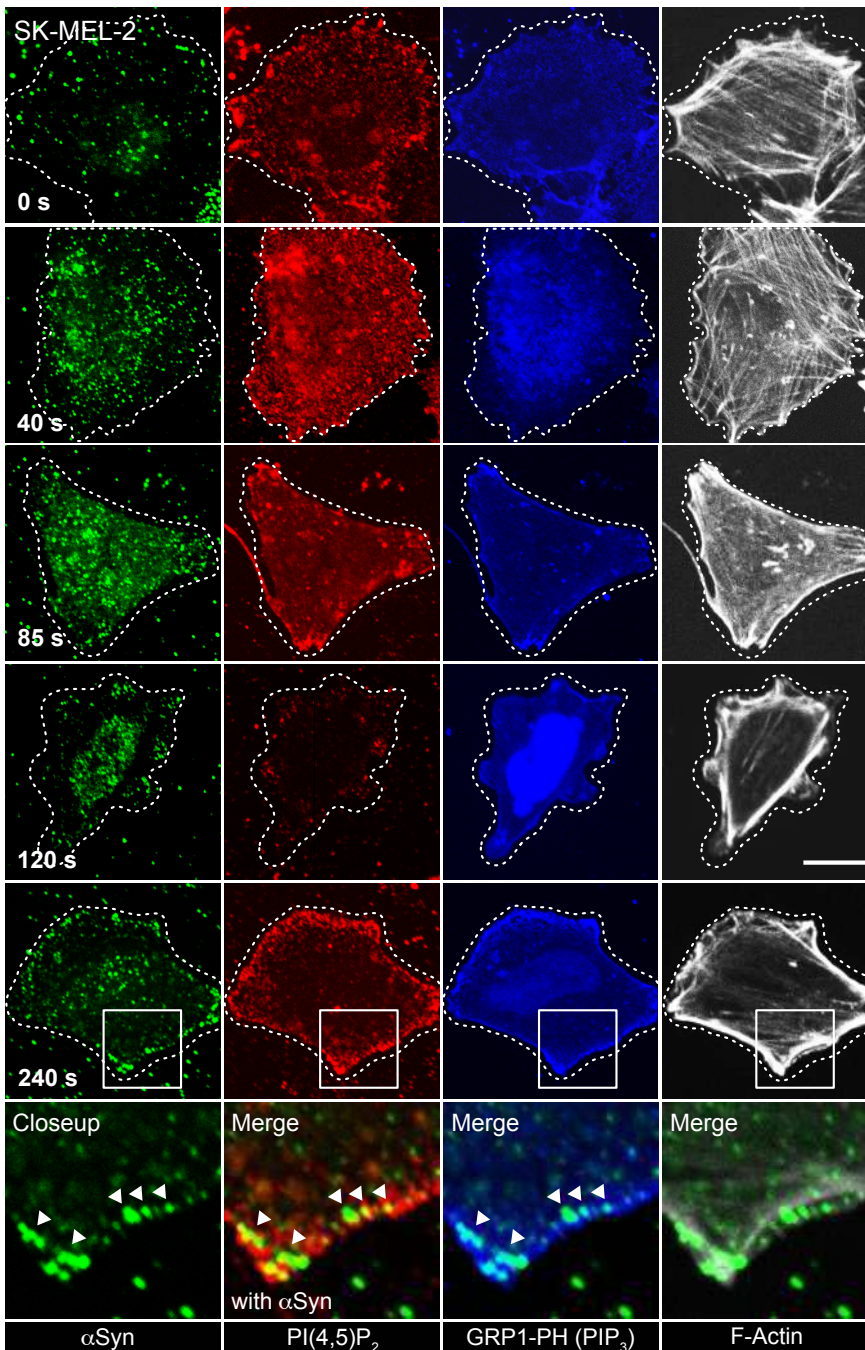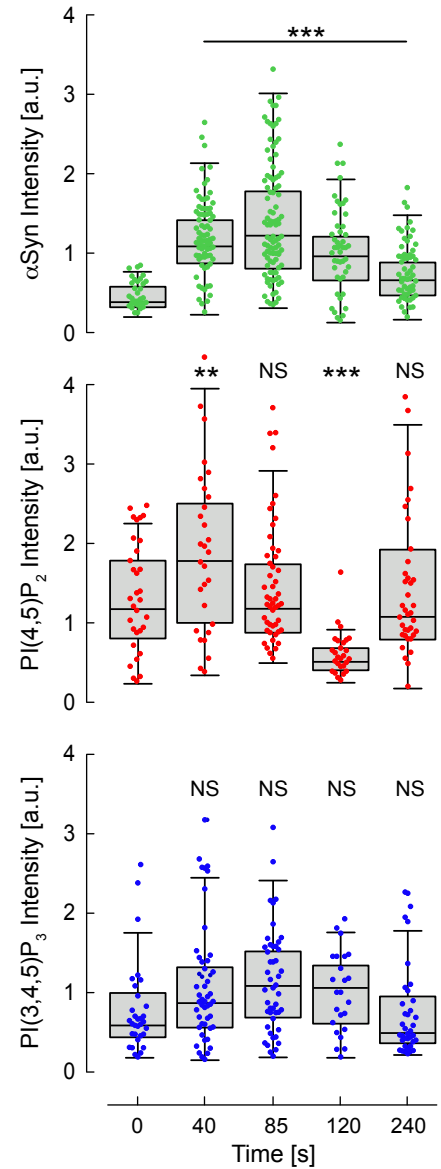

Source: https://www.biorxiv.org/content/10.1101/2020.07.31.224600v1.full.pdf
